# Supplementary material for: Platinadithiolene-conjugated pyrylium salt with strong intramolecular donor–acceptor interaction
Source: Royal Society of Chemistry journal article supplement (doi:10.1039/c0cc04762g), 2010-12-15
Supplement: c0cc04762g.pdf [file c0cc04762g.pdf]

## Electronic Supplementary Information (ESI)

### Platinadithiolene-conjugated Pyrylium Salt with Strong Intramolecular Donor-Acceptor Interaction

Koya Prabhakara Rao,<sup>a</sup> Tetsuro Kusamoto,<sup>a</sup> Yuki Yamamoto,<sup>a</sup> Shoko Kume,<sup>a</sup> Ryota Sakamoto,<sup>a</sup> Masayuki Nihei,<sup>b</sup> Hiroki Oshio,<sup>b</sup> and Hiroshi Nishihara<sup>\*a</sup>

<sup>a</sup> Department of Chemistry, School of Science, The University of Tokyo, 7-3-1 Hongo, Bunkyo-ku, Tokyo 113-0033, Japan. Fax +81(03)5841-8063; Tel: +81(03)5841-4346; E-mail: [nishihara@chems.u-tokyo.ac.jp](mailto:nishihara@chems.u-tokyo.ac.jp)

<sup>b</sup> Department of Chemistry, Graduate School of Pure and Applied Sciences, University of Tsukuba, Tennodai 1-1-1, Tsukuba 305-8571, Japan

## Experimental Section

### Synthesis:

#### 1) 1-pdtAq:

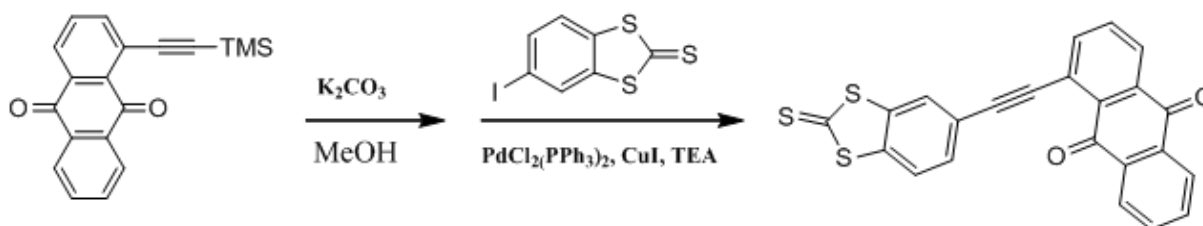

Under N<sub>2</sub>, a mixture of 1-((trimethylsilyl)ethynyl)anthraquinone (0.350 g, 1.15 mmol), and K<sub>2</sub>CO<sub>3</sub> (0.318 g, 2.31 mmol), in MeOH (40 mL) was stirred for 12 hrs. The solvent was removed under vacuum and added a mixture of 5-iodobenzo[d][1,3]dithiole-2-thione (0.357 g, 1.15 mmol) was prepared according to the reported procedure<sup>[1,2]</sup>, bis(triphenylphosphine)palladium(II) dichloride (0.161 g, 0.23 mmol) and cuprous iodide (0.088 g, 0.46 mmol) in triethylamine (50 mL, 358.73 mmol) was refluxed at 90 °C overnight. The color of the reaction mixture was changed from yellow to dark brown. After cooling to room temperature, the solvent was removed under vacuum. The residue was dissolved in chloroform and washed with water and dried with Na<sub>2</sub>SO<sub>4</sub>. The product was purified by silica gel column chromatography eluted with CH<sub>2</sub>Cl<sub>2</sub>: hexane = 3 : 1. **1-pdtAq**, was obtained in 40% yield. Anal. Calcd for C<sub>23</sub>H<sub>10</sub>O<sub>2</sub>S<sub>3</sub>·0.4(H<sub>2</sub>O): C, 65.50; H, 2.58. Found: C, 65.49; H, 2.81. <sup>1</sup>H NMR (CDCl<sub>3</sub> 400 MHz): δ 7.51(d, 1H, *J* = 8.3 Hz), 7.72 (d, 1H, *J* = 8.3 Hz), 7.80 (m, 4H), 7.98 (d, 1H, *J* = 7.8 Hz), 8.31 (d, 1H, *J* = 6.8 Hz), 8.37 (m, 2H).

### References

- (1) J. Nakayama, E. Seki, M. Hoshino, *J. Chem. Soc., Perkin Trans. I*, **1978**, 468 – 471.
- (2) J. Nakayama, H. Sugiura, M. Hoshino, *Tetrahedron Lett*, **1983**, 24, 2585-2588.

## 2) **Pt(1-pdtAq)(<sup>t</sup>Bu<sub>2</sub>bpy)**:

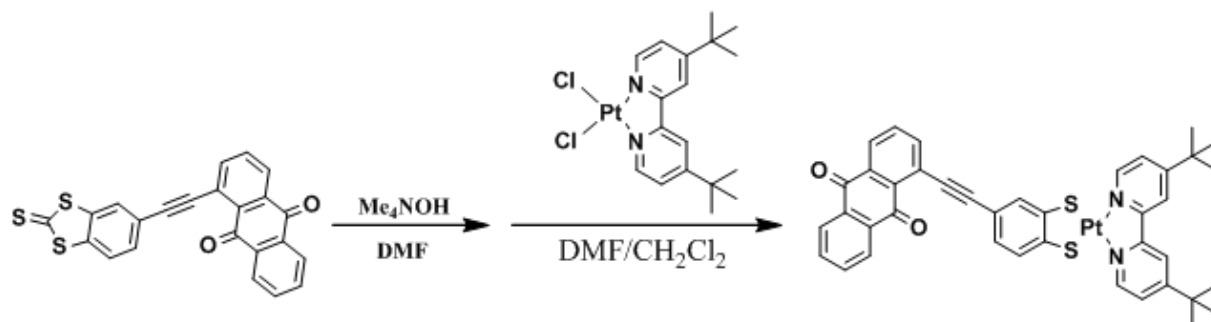

Under N<sub>2</sub>, a mixture of **1-pdtAq** (0.140 g, 0.34 mmol), and tetramethylammonium hydroxide (1.15 mL, 2.71 mmol), in DMF (25 mL) was stirred for 3 h. The color of the reaction mixture was changed from yellow to dark red. To this reaction a mixture (<sup>t</sup>Bu<sub>2</sub>bpy)PtCl<sub>2</sub> (0.216 g, 0.41 mmol) in DMF/ CH<sub>2</sub>Cl<sub>2</sub> (15/10 mL) was added and stirred at room temperature for 6 h. The color of the reaction mixture was changed from dark red to violet. The solvent was removed under vacuum. The residue was dissolved in CH<sub>2</sub>Cl<sub>2</sub> and washed with water and dried with Na<sub>2</sub>SO<sub>4</sub>. The product was purified by basic Al<sub>2</sub>O<sub>3</sub> column chromatography eluted with CH<sub>2</sub>Cl<sub>2</sub>: hexane = 5:1. **Pt(1-pdtAq)(<sup>t</sup>Bu<sub>2</sub>bpy)** was obtained in 29% yield. Anal. Calcd for C<sub>40</sub>H<sub>34</sub>N<sub>2</sub>O<sub>2</sub>PtS<sub>2</sub>·0.55(CH<sub>2</sub>Cl<sub>2</sub>): C, 55.31; H, 4.02; N, 3.18. Found: C, 55.38; H, 4.14; N, 3.01. HRMS (ESI-TOF): *m/z* = 833.1716 (calcd M<sup>+</sup> 833.1713). <sup>1</sup>H NMR (400 MHz, CDCl<sub>3</sub>): δ 7.21(dd, 1H, *J* = 9.0 Hz, 1.5Hz), 7.44 (d, 1H, *J* = 8.0 Hz), 7.50 (m, 2H), 7.73 (t, 1H, *J* = 7.8 Hz), 7.79 (m, 2H), 7.97 (m, 4H), 8.28 (m, 2H), 8.39 (d, 1H, *J* = 7.6 Hz), 9.17 (m, 2H). <sup>13</sup>C NMR (125 MHz, CDCl<sub>3</sub>): δ(ppm) 30.3, 35.9, 88.5, 98.2, 115.9, 119.7, 124.8, 125.9, 125.6, 126.7, 126.9, 127.7, 128.1, 131.8, 132.7, 132.8, 132.9, 133.7 134.5, 134.6, 140.3, 148.4, 155.7, 163.0, 183.3.

### 3) [Pt(1-pdtPyl)(<sup>t</sup>Bu<sub>2</sub>bpy)](TFSI):

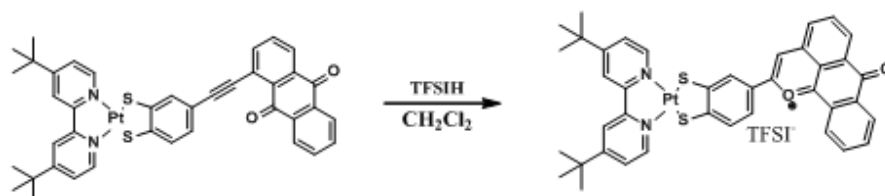

Under an argon atmosphere, **Pt(1-pdtAq)(<sup>t</sup>Bu<sub>2</sub>bpy)** (0.050 g, 0.12 mmol) was dissolved in 10 mL CH<sub>2</sub>Cl<sub>2</sub> and stirred. To this was added bis(trifluoromethanesulfone)imide (0.040 g, 1.19 in 3 mL CH<sub>2</sub>Cl<sub>2</sub>). The color of solution changed from violet to dark red. After stirring for 30 min, 20 mL hexane was added. The mixture was allowed to crystallize overnight. The dark precipitate was filtered off using a membrane filter and washed with hexane. **[Pt(1-pdtPyl)(<sup>t</sup>Bu<sub>2</sub>bpy)](TFSI)** was obtained in 85% yield. Anal. Calcd for C<sub>42</sub>H<sub>35</sub>N<sub>3</sub>O<sub>6</sub>S<sub>4</sub>F<sub>6</sub>Pt·2(H<sub>2</sub>O): C, 43.82; H, 3.41; N, 3.65 %. Found: C, 43.86; H, 3.30; N, 3.44 %. HRMS (ESI-TOF): *m/z* = 834.1794 (calcd M<sup>+</sup> 834.1791).

**NMR Measurements and Mass Spectrometry:** <sup>1</sup>H NMR and <sup>13</sup>C spectra of samples in chloroform-*d*<sub>1</sub> were collected with AL-400 (JEOL) NMR and DRX500 NMR (Bruker) spectrometer, respectively. ESI-TOF mass spectra were recorded with a LCT time-of-flight mass spectrometer (Micromass).

**UV-vis-near-IR Spectroscopy in Solution:** Samples for UV-vis-near-IR spectroscopy in solution were prepared under an argon atmosphere. UV-vis-NIR spectra were recorded with a V-570 spectrometer (JASCO). Quartz cells with a path length of 0.1 cm were utilized to observe absorption in the UV region.

**DFT calculations:** The geometries of **1-pdtAq**, **Pt(1-pdtAq)(<sup>t</sup>Bu<sub>2</sub>bpy)** and **[Pt(1-pdtPyl)(<sup>t</sup>Bu<sub>2</sub>bpy)]<sup>+</sup>** were fully optimized using the DFT methods. The three-parametrized Becke-Lee-Yang-Parr (B3LYP) hybrid exchange-correlation functional was employed. The 6-31G\*\* basis set was used for all atoms and LanL2DZ(Hay-Wadt ECP) basis set was used for Pt

atom. Based on the optimized structure, the TD-DFT method was applied to calculate the excited states relevant to the absorption spectra of each compound. The solvent effect ( $\text{CH}_2\text{Cl}_2$ ) was considered using the PCM model. The present calculations were implemented using the Gaussian03 program package.<sup>1</sup>

## References

- (1) Frisch, M. J.; Trucks, G. W.; Schlegel, H. B.; Scuseria, G. E.; Robb, M. A.; Cheeseman, J. R.; Montgomery, Jr., J. A.; Vreven, T.; Kudin, K. N.; Burant, J. C.; Millam, J. M.; Iyengar, S. S.; Tomasi, J.; Barone, V.; Mennucci, B.; Cossi, M.; Scalmani, G.; Rega, N.; Petersson, G. A.; Nakatsuji, H.; Hada, M.; Ehara, M.; Toyota, K.; Fukuda, R.; Hasegawa, J.; Ishida, M.; Nakajima, T.; Honda, Y.; Kitao, O.; Nakai, H.; Klene, M.; Li, X.; Knox, J. E.; Hratchian, H. P.; Cross, J. B.; Adamo, C.; Jaramillo, J.; Gomperts, R.; Stratmann, R. E.; Yazyev, O.; Austin, A. J.; Cammi, R.; Pomelli, C.; Ochterski, J. W.; Ayala, P. Y.; Morokuma, K.; Voth, G. A.; Salvador, P.; Dannenberg, J. J.; Zakrzewski, V. G.; Dapprich, S.; Daniels, A. D.; Strain, M. C.; Farkas, O.; Malick, D. K.; Rabuck, A. D.; Raghavachari, K.; Foresman, J. B.; Ortiz, J. V.; Cui, Q.; Baboul, A. G.; Clifford, S.; Cioslowski, J.; Stefanov, B. B.; Liu, G.; Liashenko, A.; Piskorz, P.; Komaromi, I.; Martin, R. L.; Fox, D. J.; Keith, T.; Al-Laham, M. A.; Peng, C. Y.; Nanayakkara, A.; Challacombe, M.; Gill, P. M. W.; Johnson, B.; Chen, W.; Wong, M. W.; Gonzalez, C.; Pople, J. A. *Gaussian03, Revision C.02*, Gaussian, Inc., Pittsburgh PA, **2003**.

**EPR measurements:** The spin susceptibility of the samples was measured using a JEOL FA 200. The sample solution was introduced in the sample tube and degassed by three freeze–pump–thaw cycles. Finally, the tube was sealed under vacuum.

**Magnetic susceptibility measurements:** The magnetic susceptibilities were measured using an MPMS-5S superconducting quantum interference device spectrometer (SQUID) at a field length of 2 T (Quantum Design) in the temperature range of 1.8–300 K. The scan rate of the temperature was fixed to 3.0 K/min and each measurement was performed 30 seconds after the temperature had stabilized. Aluminum foil purchased from Nippaku Co. was used for the sample

containers, the magnetic contributions of which were subtracted as background by measuring their individual magnetic susceptibilities at each experiment.

**Table S1.** Experimental and calculated excitation energies to the lowest excited state for, **[Pt(1-pdtPyl)(<sup>t</sup>Bu<sub>2</sub>bpy)]<sup>+</sup>**

| Excitation energy / eV |        | Oscillator strength<br>(Calcd. ) | Assignment<br>(CI Coefficient)                                                                           |
|------------------------|--------|----------------------------------|----------------------------------------------------------------------------------------------------------|
| Exptl.                 | Calcd. |                                  |                                                                                                          |
| 1.28                   | 1.09   | 0.0723                           | 177→178 (0.67890)                                                                                        |
| 1.75                   | 1.55   | 0.1591                           | 176→178 (0.68168)                                                                                        |
| 2.34                   | 2.33   | 0.5644                           | 174→178 (-0.13730)<br>177→179 (0.60566)<br>177→180 (-0.29292)                                            |
| 2.34                   | 2.47   | 0.0188                           | 174→178 (-0.12093)<br>177→179 (0.25248)<br>177→180 (0.60833)                                             |
| 2.82                   | 2.58   | 0.1571                           | 174→178 (0.62562)<br>176→179 (-0.15754)<br>177→180 (0.14954)                                             |
| 2.82                   | 2.72   | 0.0412                           | 176→179 (0.49118)<br>176→180 (-0.47889)                                                                  |
| 2.82                   | 2.85   | 0.2803                           | 174→178 (0.10019)<br>176→179 (0.43007)<br>176→180 (0.47649)<br>177→181 (-0.11317)                        |
| 2.82                   | 2.85   | 0.0019                           | 177→183 (0.67476)                                                                                        |
| 2.82                   | 3.01   | 0.0100                           | 172→178 (0.34991)<br>173→178 (0.60335)                                                                   |
| 2.82                   | 3.10   | 0.0127                           | 166→178 (0.30580)<br>168→178 (0.55981)<br>171→178 (-0.14825)<br>177→181 (0.16757)                        |
| 2.82                   | 3.13   | 0.0819                           | 166→178 (-0.15594)<br>171→178 (-0.26578)<br>172→178 (0.11937)<br>173→181 (-0.11792)<br>177→181 (0.59362) |

**Table S1.** (continued)

|      |      |        |                                                                                     |
|------|------|--------|-------------------------------------------------------------------------------------|
| 3.65 | 3.20 | 0.0071 | 172→178 (0.58997)<br>173→178 (-0.33151)<br>177→181 (-0.14926)<br>177→182 (0.10373)  |
| 3.65 | 3.21 | 0.0046 | 177→182 (0.68469)                                                                   |
| 3.65 | 3.22 | 0.0008 | 174→183 (0.11068)<br>175→179 (-0.16224)<br>175→180 (0.32736)<br>176→183 (0.55880)   |
| 3.65 | 3.28 | 0.0029 | 175→179 (-0.27170)<br>175→180 (0.52548)<br>176→183 (-0.33340)                       |
| 3.65 | 3.28 | 0.1332 | 166→178 (-0.21879)<br>169→178 (0.31668)<br>171→178 (0.45715)<br>177→181 (-0.24321)  |
| 3.65 | 3.39 | 0.0386 | 177→184 (0.68016)                                                                   |
| 3.65 | 3.43 | 0.0156 | 166→178 (0.52041)<br>169→178 (-0.16596)<br>171→178 (0.37441)                        |
| 3.65 | 3.59 | 0.0586 | 175→183 (0.35915)<br>176→181 (0.53748)<br>176→182 (0.19154)                         |
| 3.65 | 3.67 | 0.0286 | 175→183 (-0.24011)<br>176→182 (0.63299)                                             |
| 3.82 | 3.81 | 0.1462 | 174→179 (0.57775)<br>176→184 (0.29992)<br>177→185 (-0.13718)                        |
| 3.82 | 3.84 | 0.0094 | 177→185 (0.68085)                                                                   |
| 3.82 | 3.87 | 0.0135 | 165→178 (-0.24011)<br>174→179 (-0.27840)<br>174→180 (-0.26442)<br>176→184 (0.53566) |
| 3.82 | 3.93 | 0.0031 | 165→178 (0.67480)<br>174→179 (-0.11970)                                             |



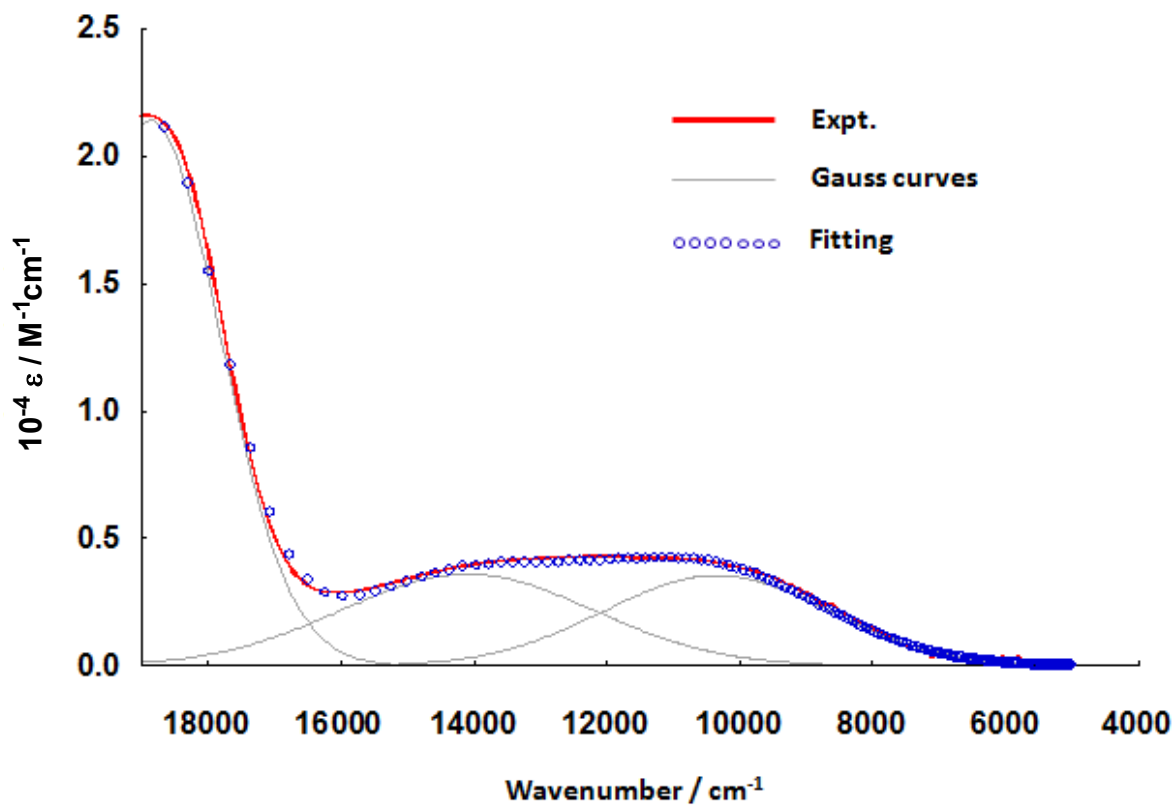

Fig. S1. Deconvolution of the IVCT band for  $[\text{Pt}(\text{1-pdtPy})(\text{tBu}_2\text{bpy})](\text{TFSI})$ .

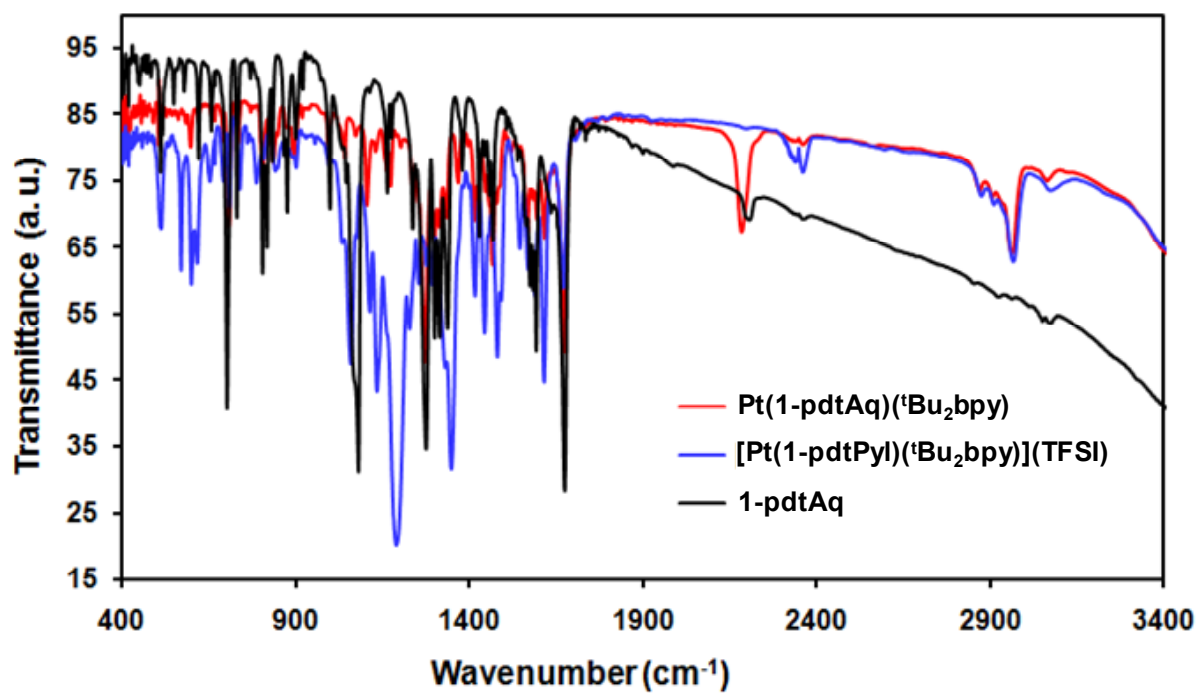

**Fig. S2.** FT-IR spectra of **1-pdtAq** (black), **Pt(1-pdtAq)(<sup>t</sup>Bu<sub>2</sub>bpy)** (red) and **[Pt(1-pdtPyl)(<sup>t</sup>Bu<sub>2</sub>bpy)](TFSI)** (blue).

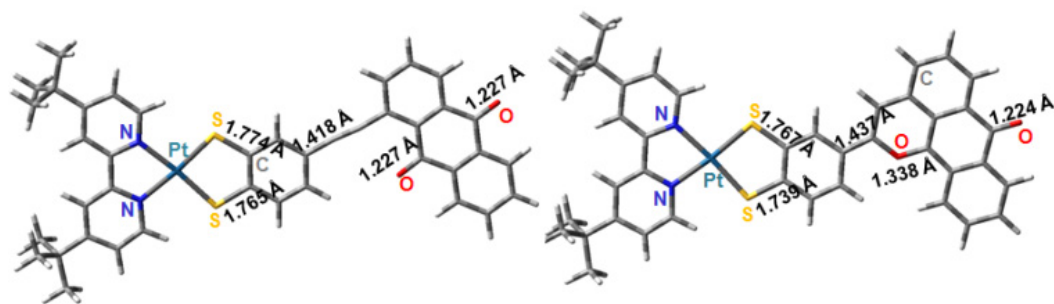

**Fig. S3.** Optimized structures of **Pt(1-pdtAq)(<sup>t</sup>Bu<sub>2</sub>bpy)** (left) and **[Pt(1-pdtPyl)(<sup>t</sup>Bu<sub>2</sub>bpy)]<sup>+</sup>** (right) by the DFT (B3LYP) method.

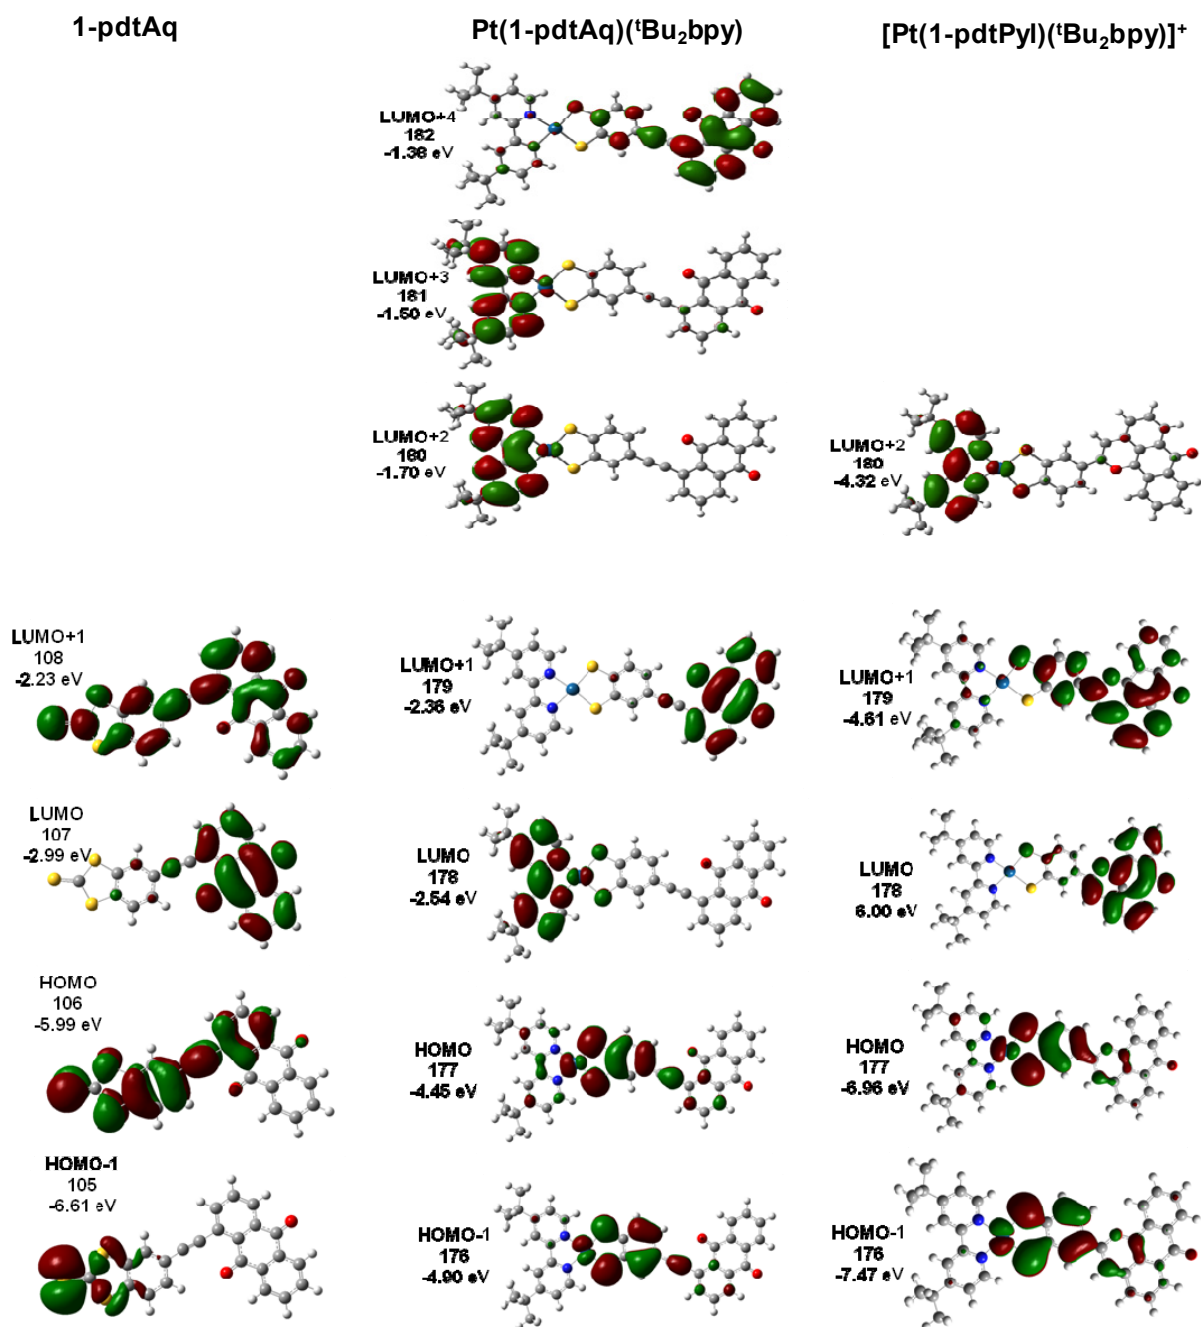

Fig. S4. Molecular orbitals calculated by the DFT method for 1-pdtAq, Pt(1-pdtAq)(<sup>t</sup>Bu<sub>2</sub>bpy) and [Pt(1-pdtPyl)(<sup>t</sup>Bu<sub>2</sub>bpy)]<sup>+</sup>.

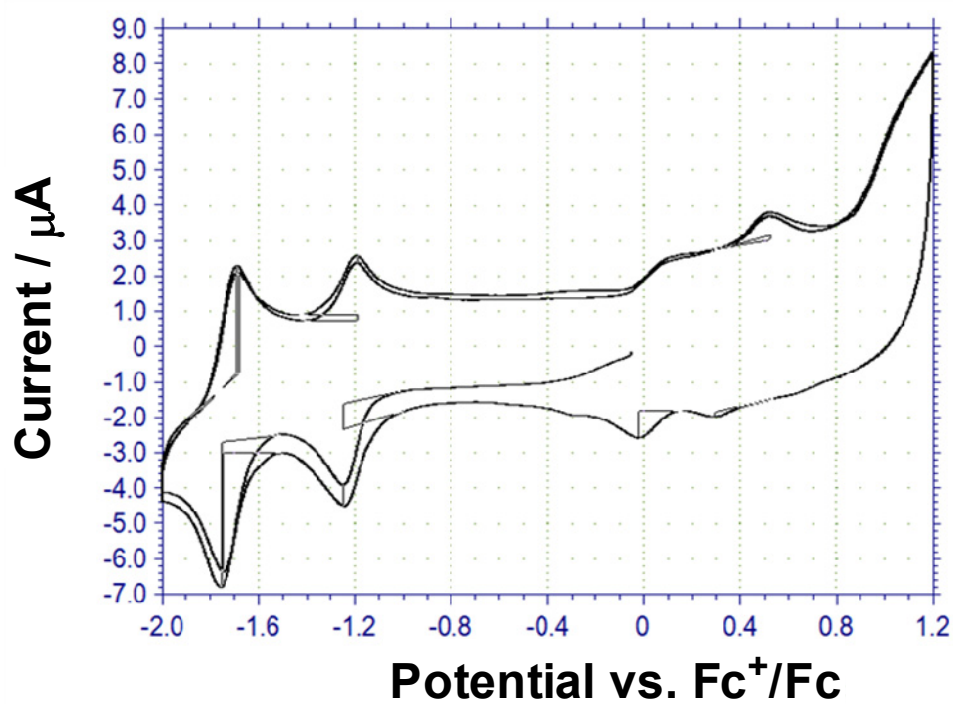

**Fig. S5.** A cyclic voltammogram of  $(\text{Pt}(\mathbf{1-pdtAq})(\mathbf{tBu_2bpy}))$  at  $0.1 \text{ Vs}^{-1}$  in  $0.1 \text{ M Bu}_4\text{NClO}_4\text{-CH}_2\text{Cl}_2$  at  $293 \text{ K}$ .

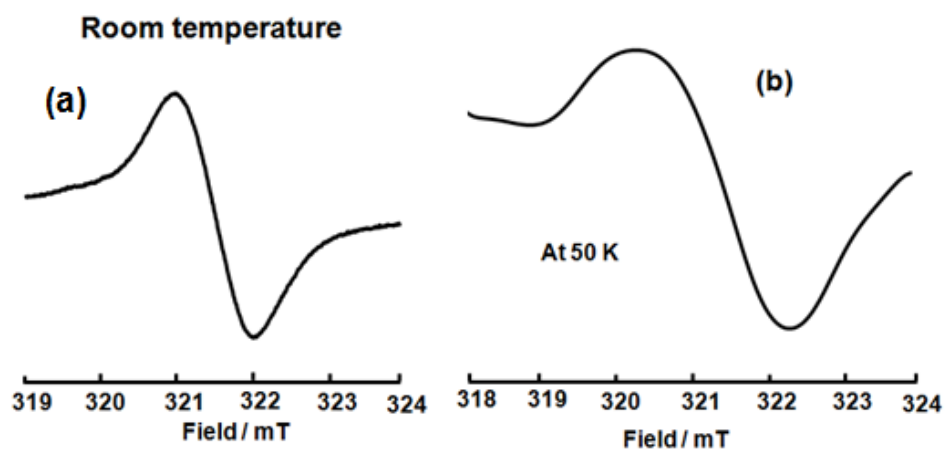

**Fig. S6.** EPR spectra of [Pt(1-pdtPy)(<sup>t</sup>Bu<sub>2</sub>bpy)](TFSI) in the solid state at room temperature (a), and in a CH<sub>2</sub>Cl<sub>2</sub> frozen solution ( $2.0 \times 10^{-4}$  M) at 50 K (b).

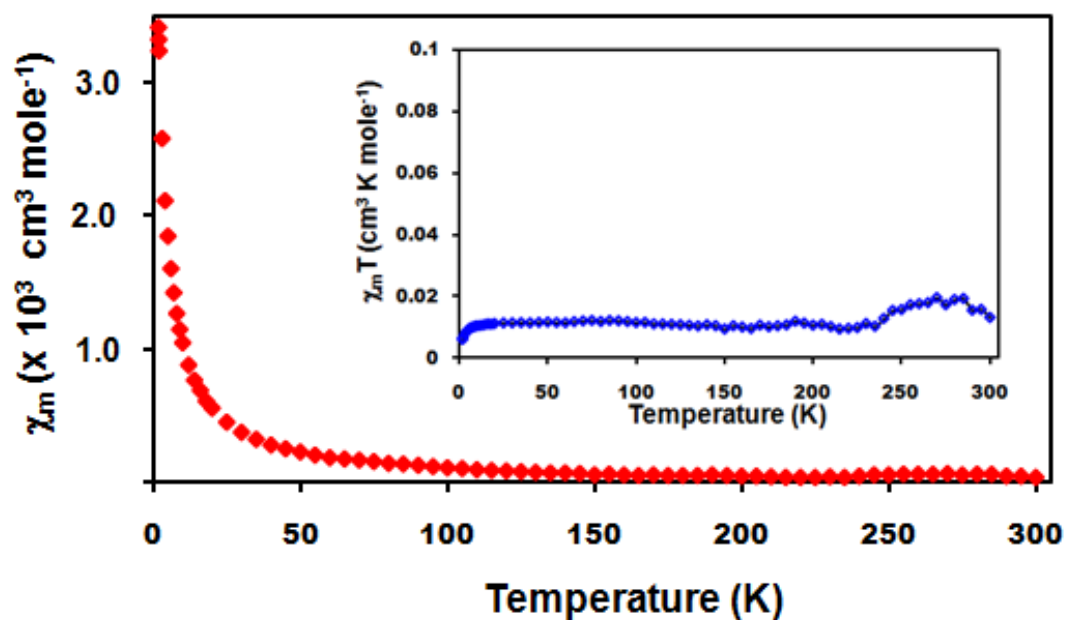

**Fig. S7.** Magnetic susceptibility ( $\chi_m$ ) vs temperature (T) plot of  $[\text{Pt}(\text{1-pdtPyl})(\text{tBu}_2\text{bpy})](\text{TFSI})$ . Inset shows a  $\chi_m T - T$  plot of  $[\text{Pt}(\text{1-pdtPyl})(\text{tBu}_2\text{bpy})](\text{TFSI})$ .
